# Supplementary material for: Determination of equivalent black carbon mass concentration from aerosol light absorption using variable mass absorption cross section
Source: Copernicus journal article supplement (doi:10.5194/amt-14-1319-2021), 2021-02-19
Supplement: Supplementary file 1 [file amt-14-1319-2021-supplement.pdf]

Supplement of Atmos. Meas. Tech., 14, 1319–1331, 2021  
<https://doi.org/10.5194/amt-14-1319-2021-supplement>  
© Author(s) 2021. This work is distributed under  
the Creative Commons Attribution 4.0 License.

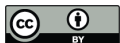

*Supplement of*

## **Determination of equivalent black carbon mass concentration from aerosol light absorption using variable mass absorption cross section**

**Weilun Zhao et al.**

*Correspondence to:* Chunsheng Zhao (zcs@pku.edu.cn)

The copyright of individual parts of the supplement might differ from the CC BY 4.0 License.

1 **1 The schematic representation of the three different measurement systems**

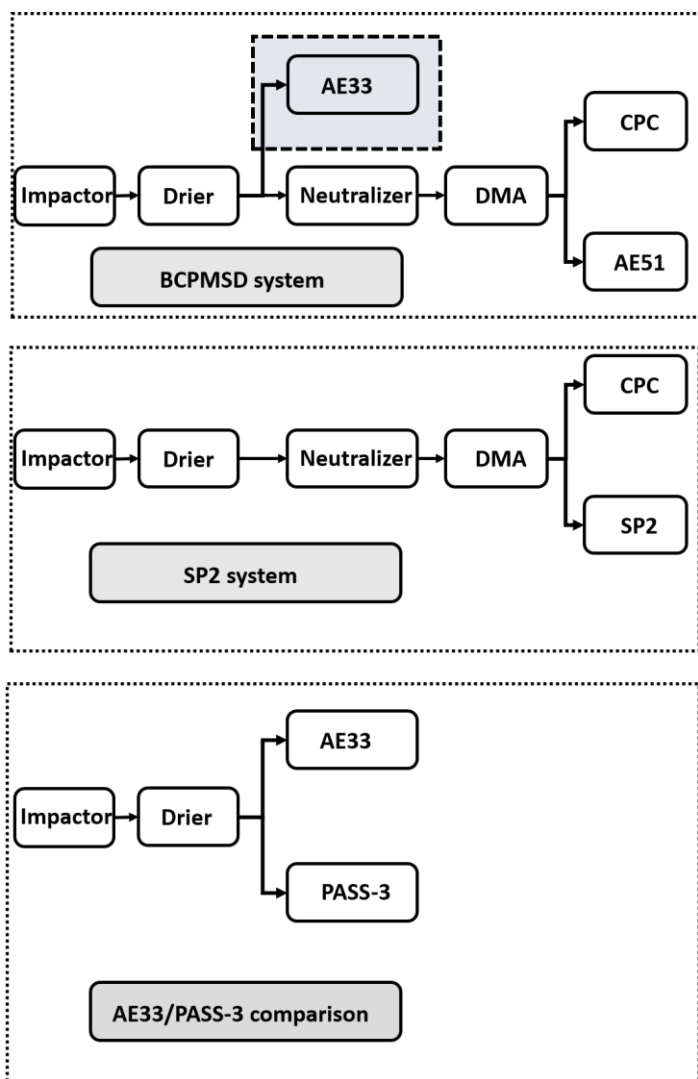

2  
3 **Figure S1. The schematic diagram of the AE33/PASS-3 comparison system, SP2 system and BCPMSD measurement system.**

4
